# Supplementary material for: Release of the ribosome biogenesis factor Bud23 from small subunit precursors in yeast
Source: PubMed Central journal article supplement — RNA. 2022 Mar;28(3):371–89. doi: 10.1261/rna.079025.121 (PMC8848936; doi:10.1261/rna.079025.121), 2022-03
Supplement: supp_079025.121_Supplemental_Methods.pdf [file supp_079025.121_Supplemental_Methods.pdf]

## Supplemental Text 1: Details of strain construction for Black and Johnson, 2021

**AJY4281:** Tag-swapping by homologous recombination of a *6xGly-FLAG-TEV-ProtA::KIURA3* cassette amplified from pAJ4028 into AJY3283 (*MATa his3Δ1 leu2Δ0 met15Δ0 ura3Δ0 ENP1-GFP::HIS3MX6*; (Huh et al. 2003)) to replace the *GFP::HIS3MX6* tag. Note that this strain grows faster than BY4741 for an unknown reason and was replaced with AJY4724.

**AJY4283:** Genomic integration of *ENP1-6xGly-FTP::KIURA3* amplified from AJY4281 into AJY3398 (Black et al. 2019).

**AJY4285:** Genomic integration of *ENP1-6xGly-FTP::KIURA3* amplified from AJY4281 into AJY3711 (Sardana et al. 2015).

**AJY4295:** Genomic integration of a *PTH-BUD23* amplicon, containing the native *BUD23* promoter, made by stitch PCR into AJY4293 (*bud23Δ::CloNAT*; A. Johnson).

**AJY4705:** Genomic integration of *ENP1-6xGly-FTP::KIURA3* amplified from AJY4283 into ToY256 (Ferreira-Cerca et al. 2005).

**AJY4706:** Genomic integration of *ENP1-6xGly-FTP::KIURA3* amplified from AJY4283 into ToY286 (Ferreira-Cerca et al. 2005).

**AJY4707:** Genomic integration of *ENP1-6xGly-FTP::KIURA3* amplified from AJY4283 into Y801 (Linnemann et al. 2019).

**AJY4710:** Genomic integration of *RIO2-AID-HA\_PGAL1-OsTIR1\_GAL4BD-ER-VP16::CloNAT* amplified from AJY4733 into BY4741.

**AJY4717:** ToY286 (Ferreira-Cerca et al. 2005) was transformed with an *RPS2 CEN URA3* plasmid and selected on SD Ura- until the *PGAL1-RPS2 CEN LEU2* vector was lost. The resultant strain was then transformed with pAJ4688 (*RPS2-GS-FLAG LEU2 CEN*) and grown on SD Leu-. The *URA3* vector was then evicted by selection on media containing 5-fluoroorotic acid (5FOA).

**AJY4718:** Like AJY4718, except pAJ2960 (*RPS2 LEU2 CEN*) was shuffled into the strain.

**AJY4719:** Genomic integration of a *6xGly-FLAG-TEV-ProtA::KIURA3* cassette, containing 50-bp of flanking homology to the 3'-end off *BUD23*, amplified from pAJ4028 into BY4741.

**AJY4721:** *UTP9-GFP::HIS3MX6* amplified from AJY3431 (Sardana et al. 2013) was then genomically integrated into AJY4717.

**AJY4722:** Like AJY4721, except *BUD23-GFP::HIS3MX6* amplified from a *BUD23-GFP::HIS3MX6* strain (Huh et al. 2003) was genomically integrated.

**AJY4723:** Like AJY4721, except *RIO2-GFP::HIS3MX6* amplified from AJY2582 (*MAT $\alpha$  his3 $\Delta$ 1 leu2 $\Delta$ 0 met15 $\Delta$ 0 ura3 $\Delta$ 0 RIO2-GFP::HIS3MX6*; (Huh et al. 2003)) was genomically integrated.

**AJY4724:** Genomic integration of *ENP1-FTP::KIURA3* amplified from AJY4705 into BY4741.

**AJY4725:** Genomic integration of *ENP1-FTP::KIURA3* amplified from AJY4705 into ToY327 (Ferreira-Cerca et al. 2005).

**AJY4731:** Y801 (Linnemann et al. 2019) was transformed with an *RPS21A CEN URA3* vector and selected on SD Ura- media until the *PGAL1-RPS21A CEN LEU2* vector was lost. The resultant strain was then transformed with pAJ4672 (*RPS21A LEU2 CEN*) and grown on SD Leu-. The *URA3* vector was then evicted by selection of media containing 5FOA.

**AJY4732:** Like AJY4731, except pAJ4693 (*RPS21A-GS-HA LEU2 CEN*) was shuffled into the strain.

**AJY4733:** Genomic integration of *AID-HA\_PGAL1-OsTIR1\_GAL4BD-ER-VP16::CloNAT* amplified from pAJ4686 into the *RIO2* locus of AJY4724.

**AJY4734:** Genomic integration of *AID-HA\_PGAL1-OsTIR1\_GAL4BD-ER-VP16::CloNAT* amplified from pAJ4392 into the *LTV1* locus of AJY4724.

**AJY4735:** Genomic integration of *AID-HA\_PGAL1-OsTIR1\_GAL4BD-ER-VP16::CloNAT* amplified from pAJ4686 into the *TSR4* locus of AJY4724.

**AJY4743:** Genomic integration of *ENP1-6xGly-FTP::KIURA3* amplified from AJY4724 into AJY4726 (*NOB1/nob1 $\Delta$ ::KanMX6*; Open Biosystems). The resultant strain was then transformed with pAJ4702 (*NOB1-AID-HA\_PGAL1-OsTIR1\_GAL4BD-ER-VP16 LEU2 CEN*), sporulated, and dissected.

**AJY4745:** ToY286 (Ferreira-Cerca et al. 2005) was transformed with an *RPS2 CEN URA3* plasmid and selected on SD Ura- until the *PGAL1-RPS2 CEN LEU2* vector was lost. The resultant strain was then transformed with pAJ2960 (*RPS2 CEN LEU2*) and grown on SD Leu-. The *URA3* vector was

then evicted by selection on media containing 5FOA. *ENP1-6xGly-FTP::KIURA3* amplified from AJY4724 was then genomically integrated into the resultant strain.

**AJY4748:** *RPS2-GS-FLAG* was genomically integrated into BY4741 using CRISPR-Cas9 as previously described (Akhmetov et al. 2018), and *ENP1-TAP::HIS3MX6* was amplified from AJY4384 (A. Johnson) and genomically integrated into the resultant *RPS2-GS-FLAG* strain.

**AJY4749:** *RPS21A-GS-HA* was genomically integrated into BY4741 using CRISPR-Cas9 as previously described (Akhmetov et al. 2018), and *ENP1-TAP::HIS3MX6* was amplified from AJY4384 (A. Johnson) and genomically integrated into the resultant *RPS21A-GS-HA* strain.

**AJY4750:** Genomic integration of *BUD23-AID-HA\_OsTIR1::LEU2* amplified from AJY4395 (Black et al. 2020) into AJY4748.

**AJY4751:** Genomic integration of *BUD23-AID-HA\_OsTIR1::LEU2* amplified from AJY4395 (Black et al. 2020) into AJY4749.

**AJY4754:** Genomic integration of *TSR1-TAP::KIURA3* amplified from LY193 (D. Lycan) into BY4741.

**AJY4755:** Genomic integration of *TSR1-TAP::KIURA3* amplified from LY193 (D. Lycan) into AJY3398 (Black et al. 2019).

**AJY4757:** Genomic integration of *TSR1-TAP::KIURA3* amplified from LY193 (D. Lycan) into AJY4710.

**AJY4761:** Genomic integration of *KanMX6::PGAL1-RPS2* amplified from AJY4755 into AJY2667.

**AJY4766:** Genomic integration of *UTP9-GFP::HIS3MX6* amplified from AJY4739 (A. Johnson) into AJY4732.

**AJY4767:** Genomic integration of *BUD23-GFP::HIS3MX6* amplified from AJY4737 (A. Johnson) into AJY4732.

**AJY4768:** Genomic integration of *RIO2-GFP::HIS3MX6* amplified from AJY4738 (A. Johnson) into AJY4732.

## References:

Akhmetov A, Laurent JM, Gollihar J, Gardner EC, Garge RK, Ellington AD, Kachroo AH, Marcotte

- EM. 2018. Single-step Precision Genome Editing in Yeast Using CRISPR-Cas9. *Bio-protocol* **8**: 1–20.
- Black JJ, Musalgaonkar S, Johnson AW. 2019. Tsr4 Is a Cytoplasmic Chaperone for the Ribosomal Protein Rps2 in *Saccharomyces cerevisiae*. *Mol Cell Biol* **39**: 1–20.
- Black JJ, Sardana R, Elmir EW, Johnson AW. 2020. Bud23 promotes the final disassembly of the small subunit Processome in *Saccharomyces cerevisiae*. *PLoS Genet* **16**: e1009215.
- Ferreira-Cerca S, Pöll G, Gleizes P-E, Tschochner H, Milkereit P. 2005. Roles of eukaryotic ribosomal proteins in maturation and transport of pre-18S rRNA and ribosome function. *Mol Cell* **20**: 263–75.
- Huh W, Falvo J V, Gerke LC, Carroll AS, Howson RW, Weissman JS, O’Shea EK. 2003. Global analysis of protein localization in budding yeast. *Nature* **425**: 686–91.
- Linnemann J, Pöll G, Jakob S, Ferreira-Cerca S, Griesenbeck J, Tschochner H, Milkereit P. 2019. Impact of two neighbouring ribosomal protein clusters on biogenesis factor binding and assembly of yeast late small ribosomal subunit precursors. *PLoS One* **14**: e0203415.
- Sardana R, Liu X, Granneman S, Zhu J, Gill M, Papoulas O, Marcotte EM, Tollervey D, Correll CC, Johnson AW. 2015. The DEAH-box helicase Dhr1 dissociates U3 from the pre-rRNA to promote formation of the central pseudoknot. *PLoS Biol* **13**: e1002083.
- Sardana R, White JP, Johnson AW. 2013. The rRNA methyltransferase Bud23 shows functional interaction with components of the SSU processome and RNase MRP. *RNA* **19**: 828–40.
